# Supplementary material
Source: PubMed Central journal article supplement (PMC8671370)
Supplement: NIHMS1756758-supplement-4.pdf [file NIHMS1756758-supplement-4.pdf]

|    | Motif Sequence Logo (MEME-ChIP)                                                     | Motif Discovery program | E-value for Jpx motif | Known Motifs (by TomTom)<br>UPxxxx : Uniprobe DB<br>MAxxxx : Jaspasr DB     | P-values for match               |
|----|-------------------------------------------------------------------------------------|-------------------------|-----------------------|-----------------------------------------------------------------------------|----------------------------------|
| 1  |    | MEME                    | 1.4e-2315             | Irf6-2 (UP00011_2)<br>PRDM1_full (Jolma 2013)<br>FOXB1_DBD_1 (Jolma 2013)   | 1.22e-03<br>2.01e-03<br>2.57e-03 |
| 2  |    | MEME                    | 8.8e-286              | ZNF263 (MA0528.1)<br>EWSR1-FLI1 (MA0149.1)                                  | 1.91e-08<br>1.29e-04             |
| 3  |    | STREME                  | 1.1e-007              | ESR2 (MA0258.2)                                                             | 2.62e-04                         |
| 4  |    | STREME                  | 5.9e-005              | Zfp652_DBD (Jolma 2013)                                                     | 5.52e-03                         |
| 5  |    | STREME                  | 2.3e-004              | Pitx1 (MA0682.1)                                                            | 7.96e-05                         |
| 6  |    | STREME                  | 3.4e-004              | Mafk-1 (UP00044_1)<br>FOS (MA0476.1)                                        | 2.42e-03<br>3.56e-03             |
| 7  |    | STREME                  | 4.4e-004              | FOXC1_DBD_1 (Jolma 2013)<br>FOXL1_full_2 (Jolma 2013)<br>ONECUT3 (MA0757.1) | 1.30e-05<br>4.37e-05<br>4.53e-05 |
| 8  |    | STREME                  | 1.5e-002              | Jundm2-2 (UP00103_2)<br>FOSL1::JUN (MA1128.1)                               | 1.11e-04<br>3.10e-04             |
| 9  |   | STREME                  | 1.5e-002              | Sox13 (UP00096_1)<br>Zfp691 (UP00095_1)<br>ISL2 (MA0914.1)                  | 1.69e-03<br>2.14e-03<br>2.29e-03 |
| 10 |  | STREME                  | 1.9e-002              | JUN(var.2) (MA0489.1)<br>BATF::JUN (MA0462.1)                               | 2.35e-04<br>5.52e-04             |
| 11 |  | STREME                  | 2.0e-002              | Gm397-2 (UP00042_2)<br>ZSCAN4 (MA1155.1)                                    | 3.61e-05<br>1.01e-04             |
| 12 |  | STREME                  | 3.1e-002              | CTCF (MA0139.1)<br>CTCFL (MA1102.1)                                         | 8.09e-06<br>3.74e-05             |
| 13 |  | STREME                  | 3.1e-002              | NFIA (MA0670.1)<br>RFX2/3/4 (Jolma 2013)<br>MEIS3 (MA0775.1)                | 1.15e-03<br>1.45e-03<br>2.73e-03 |
| 14 |  | STREME                  | 3.1e-002              | Nr5a2 (MA0505.1)<br>Stat92E (MA0532.1)                                      | 2.50e-04<br>3.80e-04             |
| 15 |  | STREME                  | 3.5e-002              | POU3F2/3/4 (Jolma 2013)<br>Pou2f3 (MA0627.1)<br>DMRT3 (MA0610.1)            | 1.27e-03<br>1.89e-03<br>5.49e-03 |
| 16 |  | STREME                  | 3.8e-002              | SPDEF (MA0686.1)<br>ZNF410 (MA0752.1)<br>YY2 (Jolma 2013)                   | 1.61e-03<br>2.44e-03<br>3.77e-03 |
| 17 |  | STREME                  | 4.4e-002              | KLF5 (MA0599.1)<br>Klf1 (MA0493.1)<br>SP1 (MA0079.3)                        | 1.58e-05<br>9.46e-05<br>1.11e-04 |
| 18 |  | STREME                  | 4.6e-002              | Nr5a2 (MA0505.1)<br>ESRRB (MA0141.3)<br>Esrra (MA0592.2)                    | 1.09e-04<br>2.08e-04<br>2.08e-04 |

Figure S4
