# Supplementary material
Source: PubMed Central journal article supplement (PMC8671370)

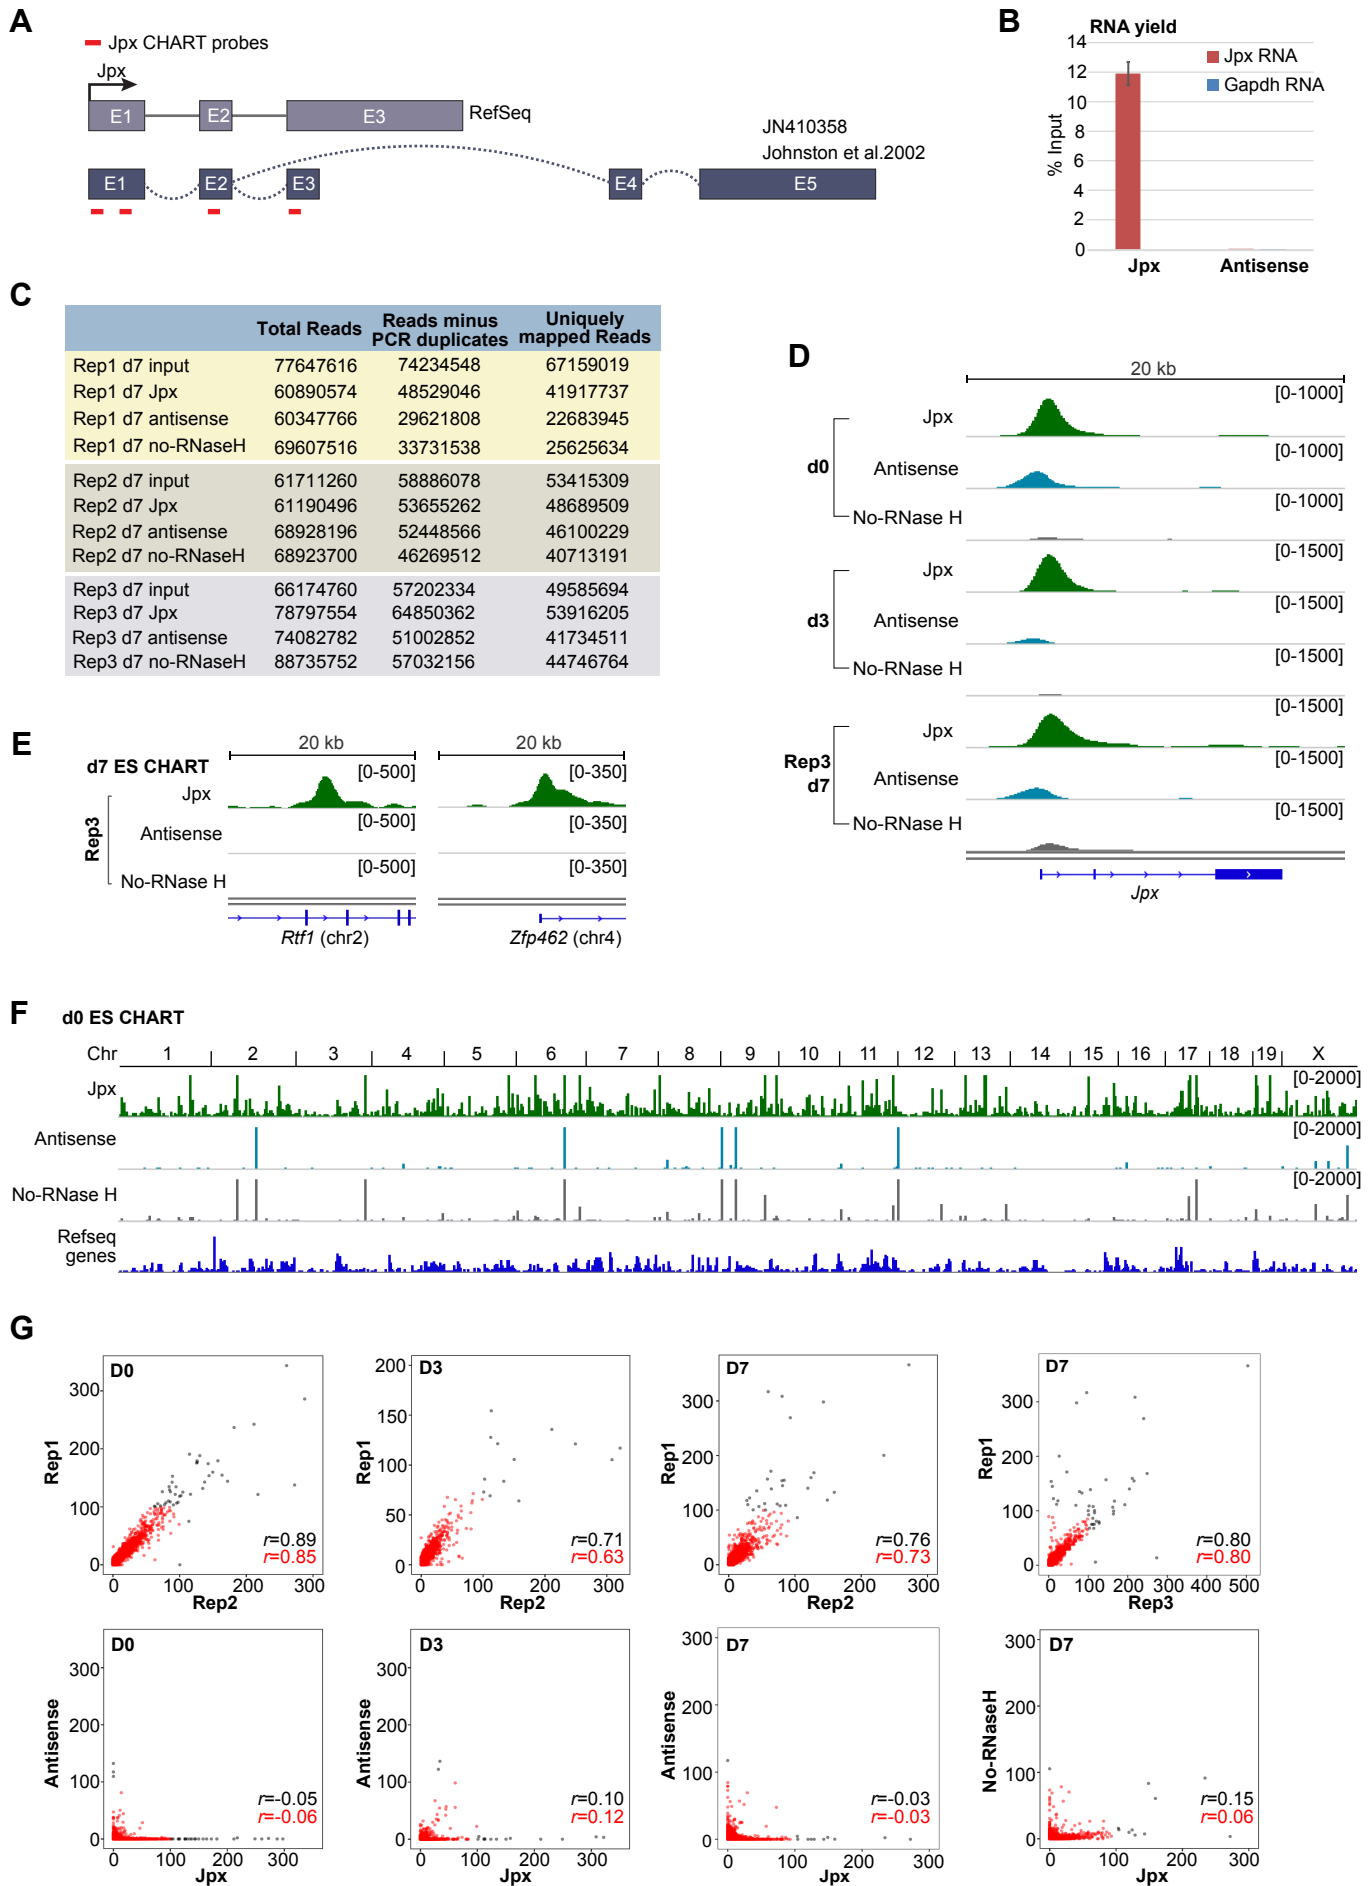

Figure S1

Supplement: NIHMS1756758-supplement-1.pdf [file NIHMS1756758-supplement-1.pdf]

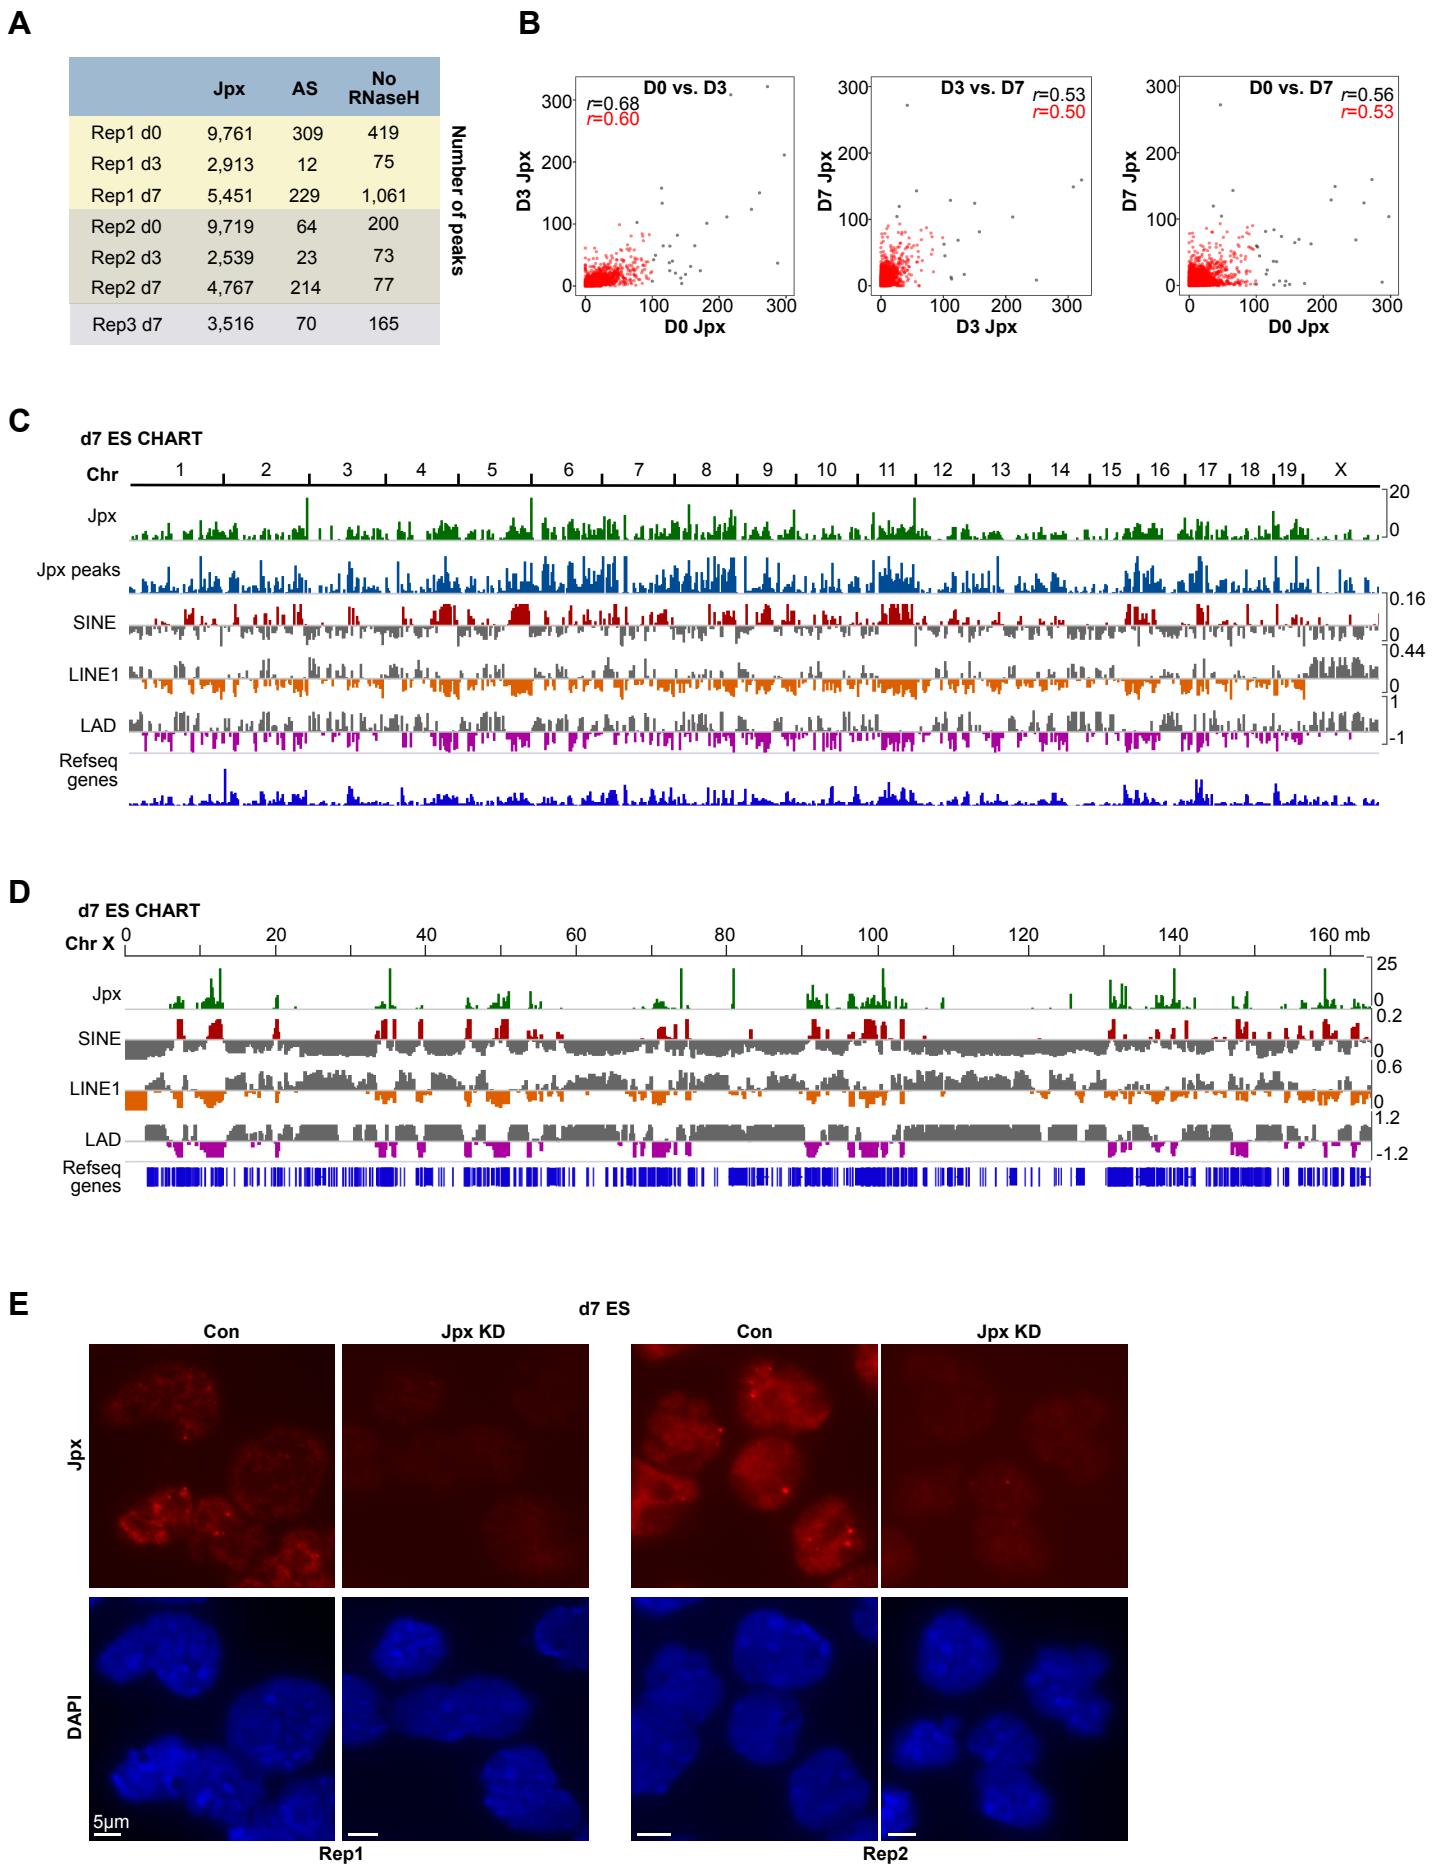

Figure S2

Supplement: NIHMS1756758-supplement-2.pdf [file NIHMS1756758-supplement-2.pdf]

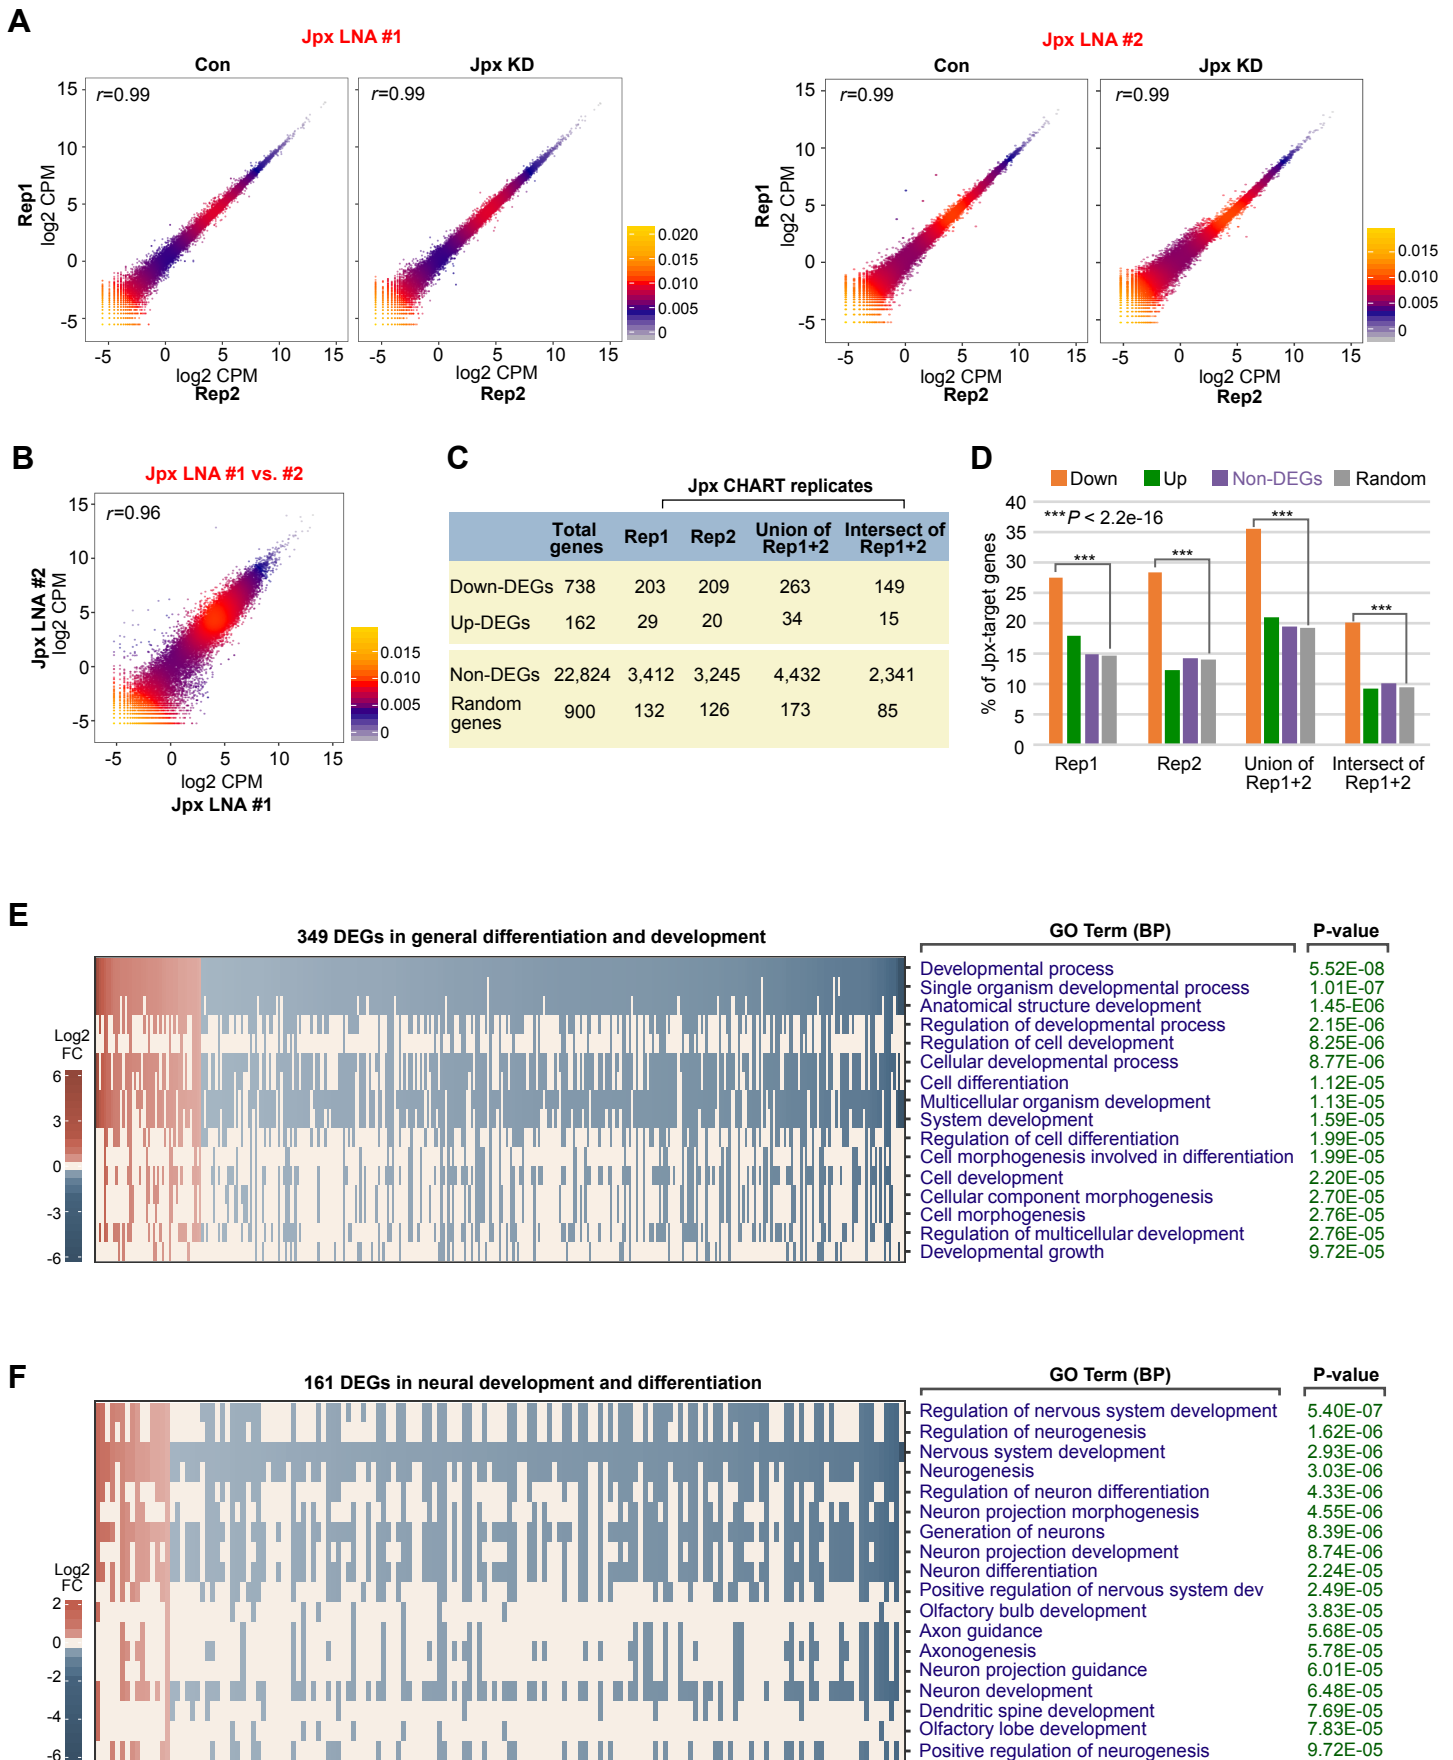

Figure S3

Supplement: NIHMS1756758-supplement-3.pdf [file NIHMS1756758-supplement-3.pdf]

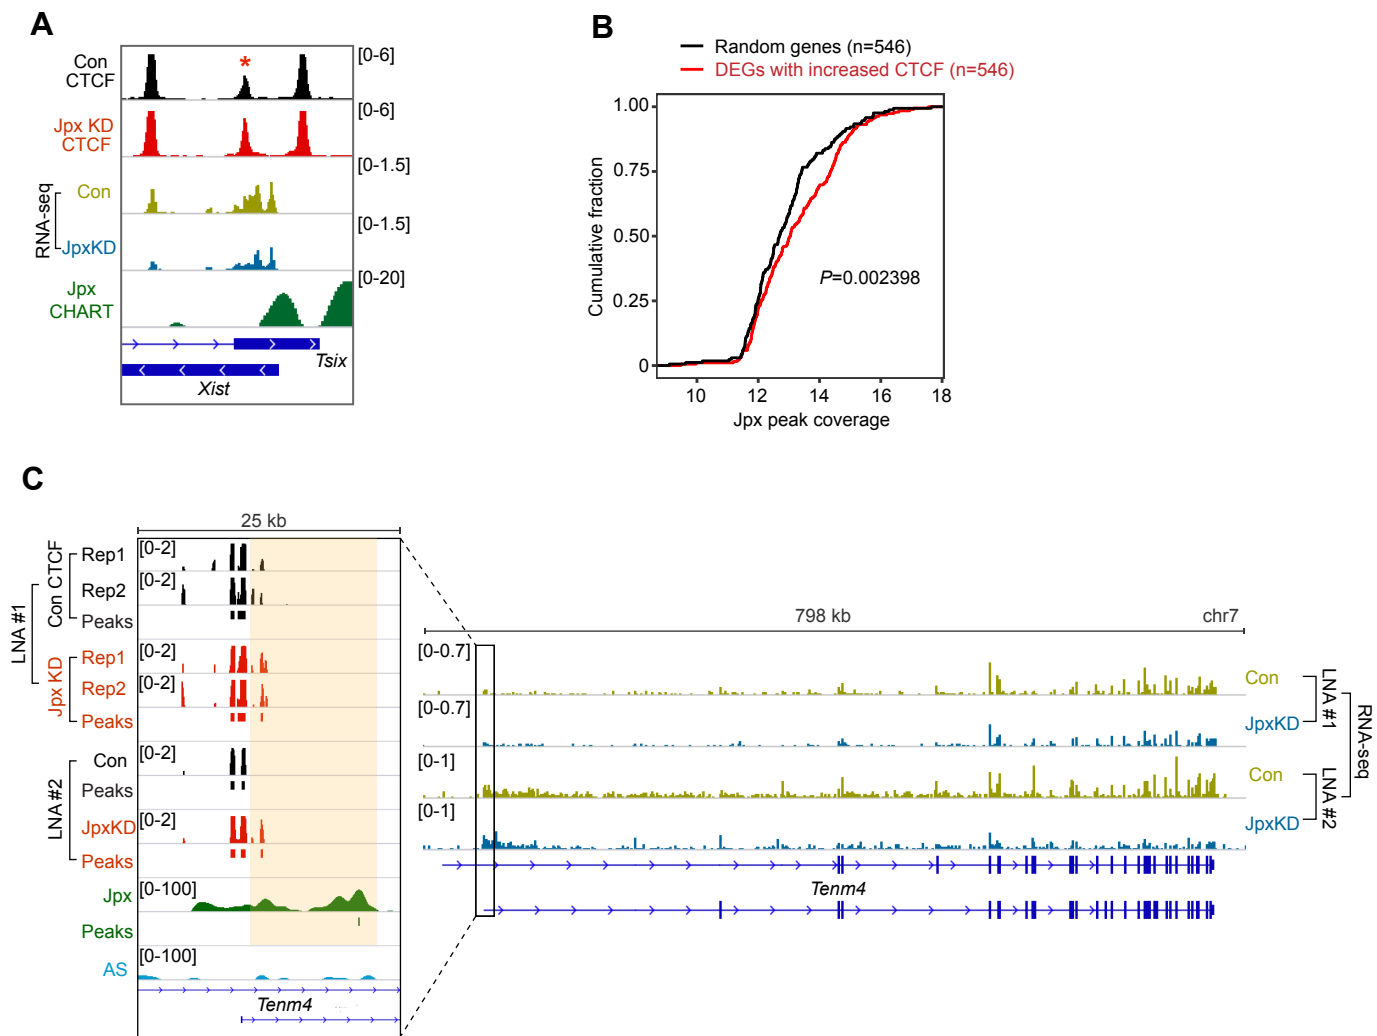

Figure S5

Supplement: NIHMS1756758-supplement-5.pdf [file NIHMS1756758-supplement-5.pdf]

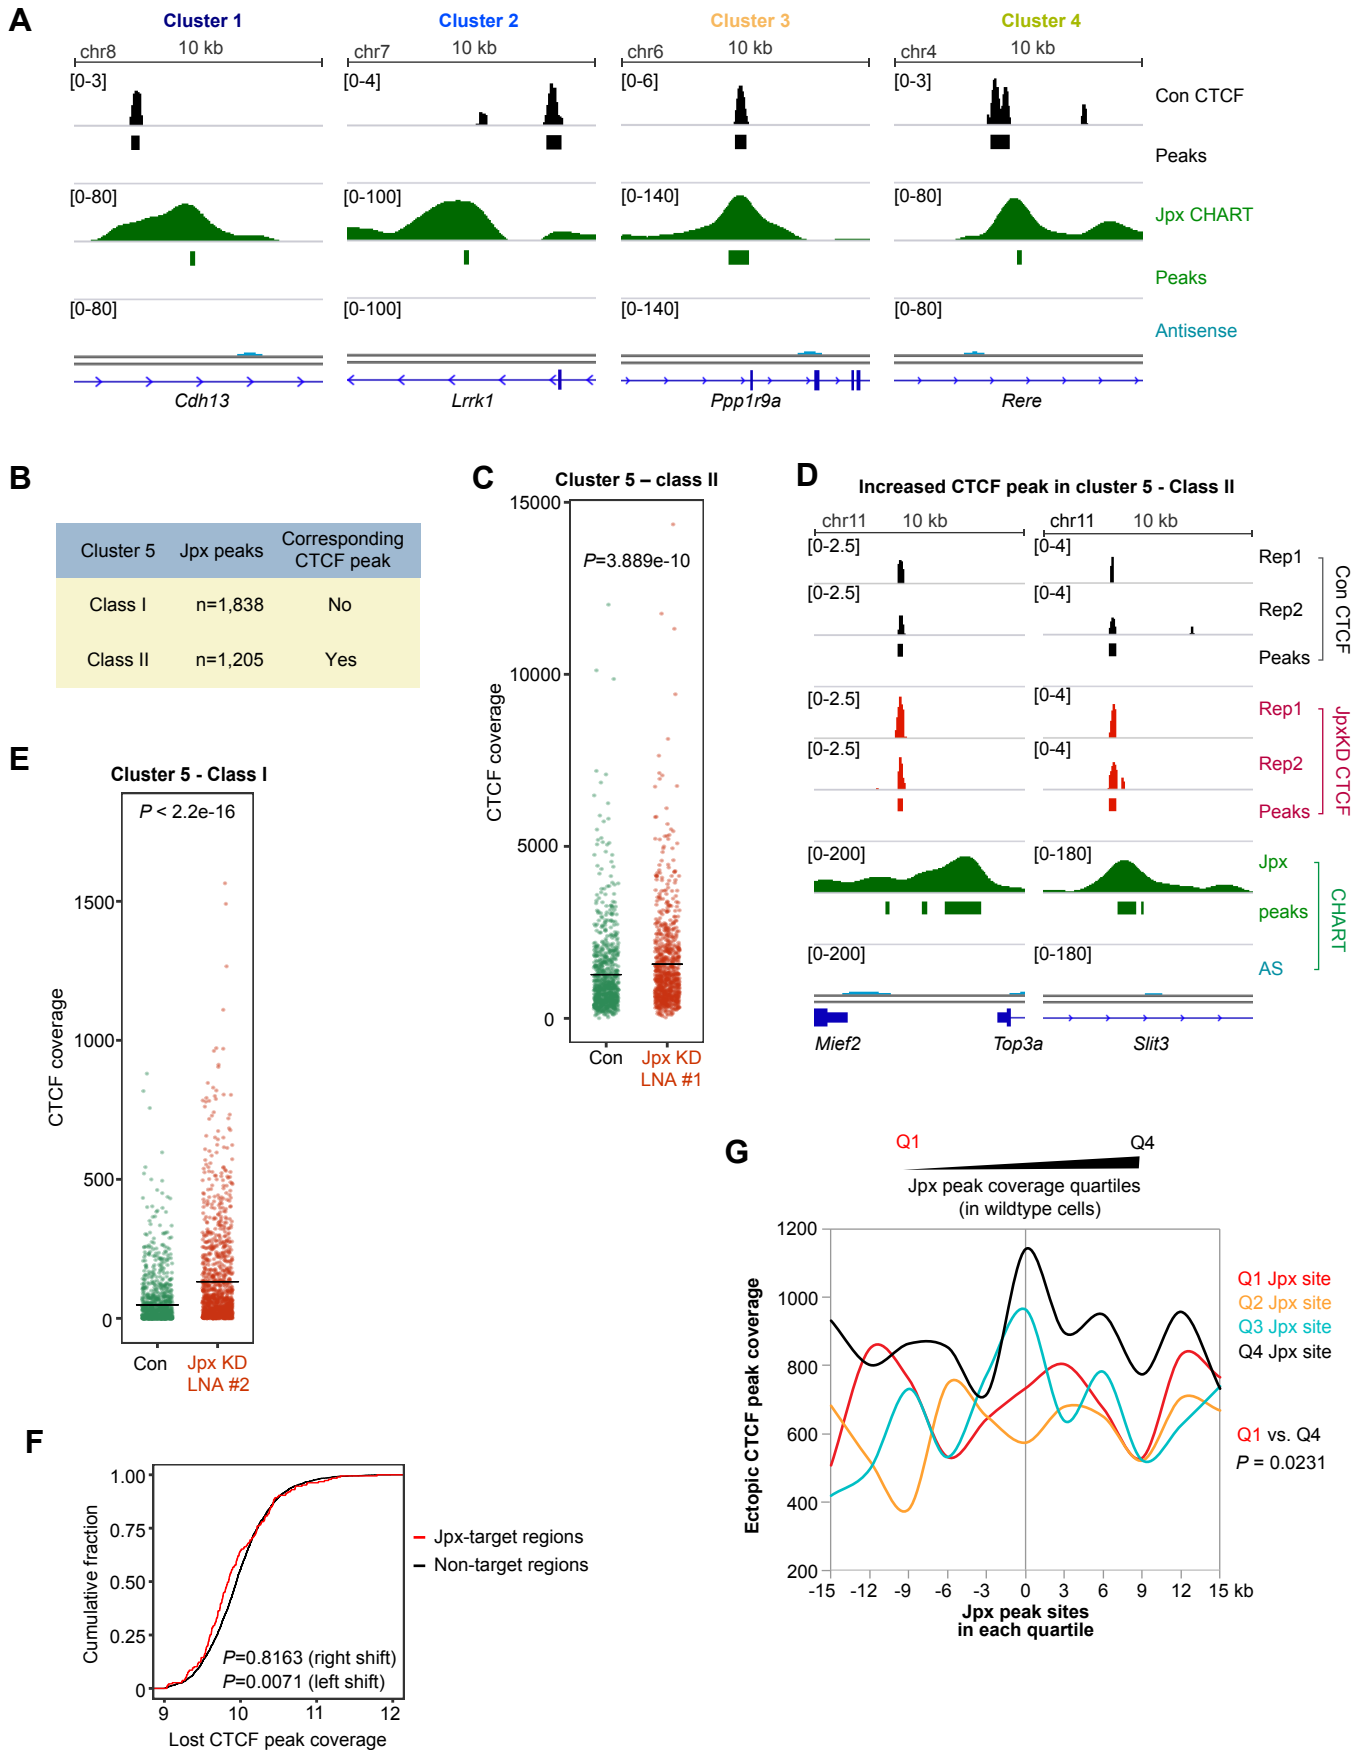

Figure S6

Supplement: NIHMS1756758-supplement-6.pdf [file NIHMS1756758-supplement-6.pdf]

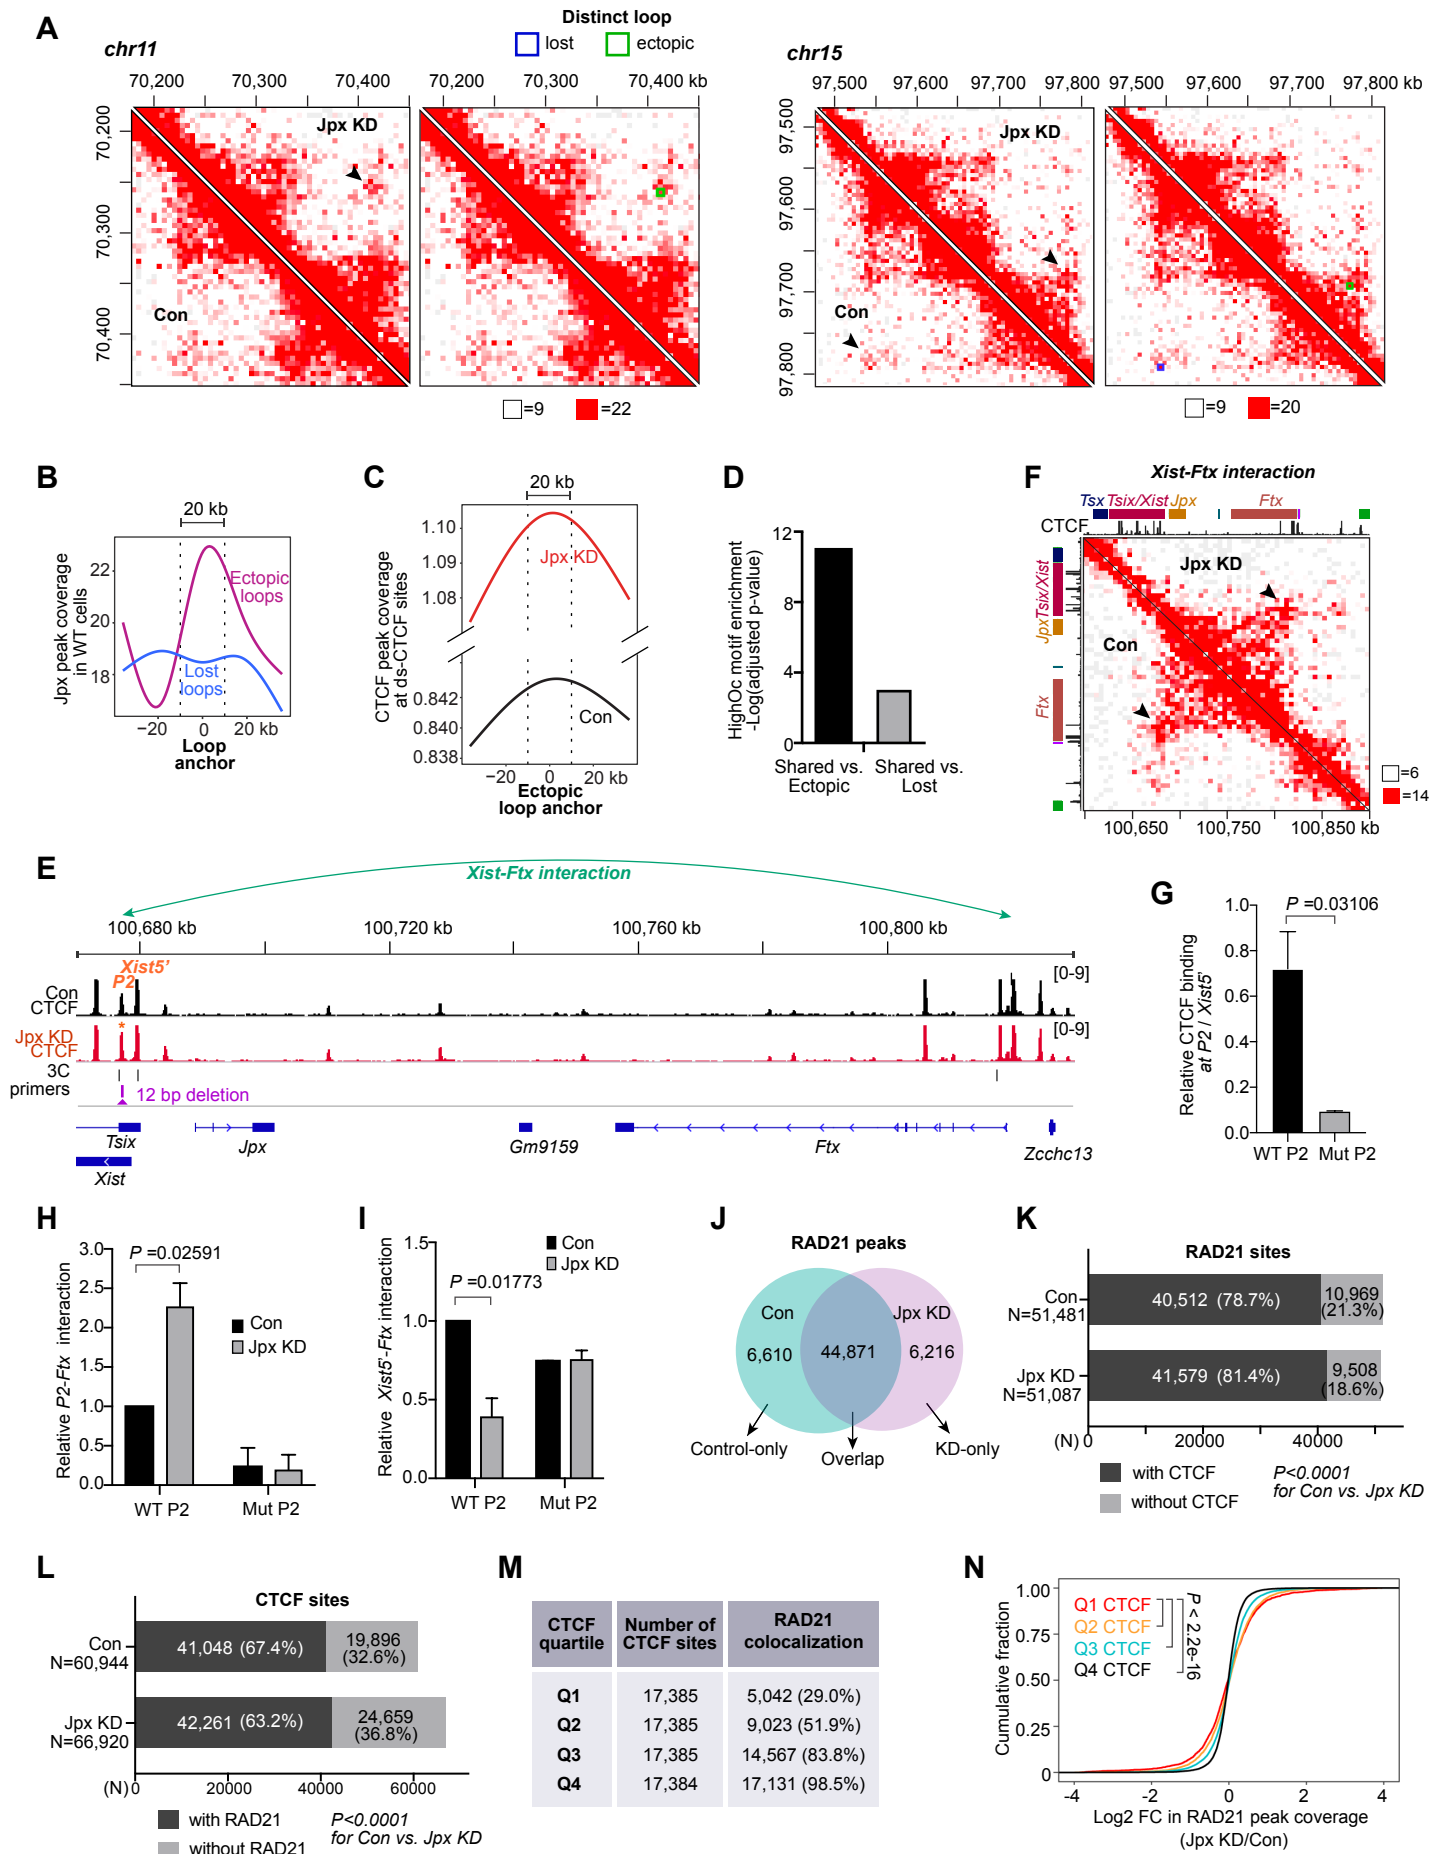

Figure S7

Supplement: NIHMS1756758-supplement-7.pdf [file NIHMS1756758-supplement-7.pdf]
